# Supplementary material for: Evidence for Reconsidering the Taxonomic Status of Closely Related Oligonychus Species in punicae Complex (Acari: Prostigmata: Tetranychidae)
Source: MDPI journal article supplement (doi:10.3390/insects14010003), 2022-12-21
Supplement: s1 [file s1]

# Evidence for Reconsidering the Taxonomic Status of Closely Related *Oligonychus* Species in *punicae* Complex (Acari: Prostigmata: Tetranychidae)

Hafiz Muhammad Saqib Mushtaq <sup>1</sup>, Muhammad Kamran <sup>1</sup>, Amgad A. Saleh <sup>2</sup>, Fahad Jaber Alatawi <sup>1,\*</sup>

<sup>1</sup> Acarology Research Laboratory, Department of Plant Protection, College of Food and Agriculture Sciences, King Saud University, P.O. Box No. 2460, Riyadh 11451, Saudi Arabia; [hmushtaq@ksu.edu.sa](mailto:hmushtaq@ksu.edu.sa) (H.M.S.M.); [murafique@ksu.edu.sa](mailto:murafique@ksu.edu.sa) (M.K.)

<sup>2</sup> Plant Pathology Laboratory, Department of Plant Protection, College of Food and Agriculture Sciences, King Saud University, P.O. Box No. 2460, Riyadh 11451, Saudi Arabia; [amgsaleh@ksu.edu.sa](mailto:amgsaleh@ksu.edu.sa)

\* Correspondence: [falatawi@ksu.edu.sa](mailto:falatawi@ksu.edu.sa)

Number of supplementary tables: 5

**Table S1.** Geographical distribution, host plant, collection details, ITS2/COI fragment size and GenBank accession numbers of 40 spider mite samples of the *punicae* species complex collected from Egypt, Mexico, Pakistan & Saudi Arabia and analyzed morphologically/molecularly in the present study.

| Sample voucher no. | Collection date | Locality, Province, Country        | Host Plant                                  | Collector name (Reference)         | GPS                        | GenBank accession numbers |          | ITS2 fragment size (bp) | COI fragment size (bp) |
|--------------------|-----------------|------------------------------------|---------------------------------------------|------------------------------------|----------------------------|---------------------------|----------|-------------------------|------------------------|
|                    |                 |                                    |                                             |                                    |                            | ITS2                      | COI      |                         |                        |
| 1                  | 09 May 2018     | Wadi Dawasir, Riyadh, Saudi Arabia | <i>Mangifera indica</i> L. (Anacardiaceae)  | HMS Mushtaq, JS Basahih & M Kamran | 20°27'3.56"N, 44°50'6.95"E | MZ435892                  | MZ425481 | 497                     | 408                    |
| 5                  | 10 May 2018     | Abu Arish, Jizan, Saudi Arabia     | <i>Conocarpus erectus</i> L. (Combretaceae) | HMS Mushtaq, JS Basahih & M Kamran | 16°59'4.09"N, 42°49'6.75"E | MZ435893                  | N/A      | 497                     | N/A                    |
| 6                  | 07 May 2017     | Al-Ula, Madinah, Saudi Arabia      | <i>M. indica</i>                            | EM Khan                            | 26°40'5.86"N, 37°53'4.77"E | MZ435894                  | N/A      | 497                     | N/A                    |
| 13                 | 09 May 2018     | Wadi Dawasir, Riyadh, Saudi Arabia | Unknown                                     | HMS Mushtaq, JS Basahih & M Kamran | 20°25'1.99"N, 44°43'5.55"E | MZ435895                  | N/A      | 497                     | N/A                    |
| 14                 | 20 May 2018     | Al-Ula, Madinah, Saudi Arabia      | <i>M. indica</i>                            | HMS Mushtaq, JH Mirza & M Kamran   | 26°51'0.94"N, 37°57'9.47"E | MZ435896                  | N/A      | 494                     | N/A                    |
| 21                 | 08 May 2018     | Hariq, Riyadh, Saudi Arabia        | <i>Punica granatum</i> L. (Lythraceae)      | HMS Mushtaq, JS Basahih & M Kamran | 23°37'8.43"N, 46°31'9.42"E | MZ435897                  | MZ425482 | 497                     | 408                    |
| 26                 | 02 May 2018     | Unayzah, Qassim, Saudi Arabia      | <i>M. indica</i>                            | HMS Mushtaq, JH Mirza & M Kamran   | 25°51'02.6"N, 44°13'09.4"E | MZ435898                  | N/A      | 456-460                 | N/A                    |
| 27                 | 09 May 2018     | Wadi Dawasir, Riyadh, Saudi Arabia | <i>P. granatum</i>                          | HMS Mushtaq, JS Basahih & M Kamran | 20°27'8.29"N, 44°52'1.37"E | MZ435899                  | N/A      | 497                     | N/A                    |
| 37                 | 09 Mar 2019     | Diriyah, Riyadh, Saudi Arabia      | <i>C. erectus</i>                           | HMS Mushtaq                        | 24°45'35.0"N, 46°33'56.7"E | MZ435900                  | MZ425483 | 497                     | 410                    |
| 42                 | 06 May 2019     | Al Badari, Asyut, Egypt            | <i>M. indica</i>                            | FA Marei                           | 26°59'18.7"N, 31°23'36.8"E | MZ435901                  | MZ425484 | 497                     | 410                    |
| 43                 | 12 Apr 2019     | Diriyah, Riyadh, Saudi Arabia      | <i>C. erectus</i>                           | HMS Mushtaq                        | 24°44'51.6"N, 46°31'43.5"E | MZ435902                  | N/A      | 489                     | N/A                    |
| 44                 | 26 May 2018     | Dumah Al-Jandal, Jof, Saudi Arabia | <i>Vitis vinifera</i> L. (Vitaceae)         | HMS Mushtaq, JH Mirza & M Kamran   | 29°47'4.32"N, 39°52'6.80"E | MZ435903                  | N/A      | 473                     | N/A                    |
| 48                 | 16 Aug 2019     | Daira Din Panah, Punjab, Pakistan  | <i>M. indica</i>                            | M Iftikhar                         | 30°34'31.7"N, 70°57'14.3"E | MZ435904                  | MZ425485 | 497                     | 410                    |
| 52*                | 09 Oct 2019     | Chiautla, Estado de México, Mexico | <i>Alnus jorulensis</i> Kunth (Betulaceae)  | MT Santillán-Galicia               | 19°32'33.1"N, 98°52'33.1"W | MZ435920                  | OP825124 | 429                     | 403-410                |
| 56                 | 01 Nov 2019     | Qunfudhah, Makkah, Saudi Arabia    | <i>C. erectus</i>                           | HMS Mushtaq, & M Kamran            | 19°07'58.5"N, 41°04'36.2"E | MZ435905                  | N/A      | 470                     | N/A                    |
| 59                 | 01 Nov 2019     | Qunfudhah, Makkah, Saudi Arabia    | <i>M. indica</i>                            | HMS Mushtaq, & M Kamran            | 19°23'4.45"N, 41°03'7.82"E | MZ435906                  | MZ425486 | 497                     | 408                    |
| 62                 | 13 Apr 2019     | Uyaynah, Riyadh, Saudi Arabia      | <i>C. erectus</i>                           | HMS Mushtaq                        | 24°53'13.9"N, 46°19'26.5"E | MZ435907                  | MZ425487 | 425                     | 410                    |
| 63                 | 13 Apr 2019     | Jubaylah, Riyadh, Saudi Arabia     | <i>C. erectus</i>                           | HMS Mushtaq                        | 24°53'49.2"N, 46°26'54.3"E | MZ435908                  | MZ425488 | 428                     | 410                    |
| 64                 | 12 Apr 2019     | Wadi Hanifah, Riyadh, Saudi Arabia | <i>C. erectus</i>                           | HMS Mushtaq                        | 24°43'4.20"N, 46°34'3.68"E | MZ435909                  | N/A      | 463                     | N/A                    |
| 70                 | 22 May 2018     | Tabuk, Tabuk, Saudi Arabia         | <i>P. granatum</i>                          | HMS Mushtaq, JH Mirza & M Kamran   | 28°27'24.8"N, 36°33'34.9"E | MZ435910                  | N/A      | 497                     | N/A                    |
| 71**               | 12 Nov 2019     | Faisalabad, Punjab, Pakistan       | <i>M. indica</i>                            | MH Bashir, EM Khan                 | 31°25'44.0"N, 73°04'19.4"E | MZ435911                  | MZ425489 | 430                     | 410                    |
| 72**               | 12 Nov 2019     | Faisalabad, Punjab, Pakistan       | <i>V. vinifera</i>                          | MH Bashir, EM Khan                 | 31°25'44.0"N, 73°04'19.4"E | MZ435912                  | MZ425490 | 444                     | 410                    |
| 73                 | 08 Nov 2019     | Sargodha, Punjab, Pakistan         | <i>P. granatum</i>                          | M. Afzal                           | 32°08'2.7"N, 72°41'36.2"E  | MZ435913                  | N/A      | 465                     | N/A                    |
| 74                 | 08 Nov 2019     | Sargodha, Punjab, Pakistan         | <i>M. indica</i>                            | M Afzal                            | 32°08'2.7"N, 72°41'36.2"E  | MZ435914                  | MZ425491 | 445                     | 410                    |
| 75                 | 08 Nov 2019     | Sargodha, Punjab, Pakistan         | <i>V. vinifera</i>                          | M Afzal                            | 32°08'2.7"N, 72°41'36.2"E  | N/A                       | N/A      | N/A                     | N/A                    |
| 76                 | 20 May 2018     | Al-Ula, Madinah, Saudi Arabia      | <i>P. granatum</i>                          | HMS Mushtaq, JH Mirza & M Kamran   | 26°05'2.24"N, 37°58'2.22"E | MZ435915                  | N/A      | 493                     | N/A                    |
| 77                 | 20 May 2018     | Al-Ula, Madinah, Saudi Arabia      | <i>P. granatum</i>                          | HMS Mushtaq, JH Mirza & M Kamran   | 26°51'0.94"N, 37°57'9.47"E | MZ435916                  | N/A      | 468                     | N/A                    |
| 78                 | 22 May 2018     | Tabuk, Tabuk, Saudi Arabia         | <i>P. granatum</i>                          | HMS Mushtaq, JH Mirza & M Kamran   | 28°26'13.2"N, 36°39'06.7"E | MZ435917                  | MZ425492 | 446                     | 410                    |

|     |             |                                   |                               |                                    |                               |          |          |     |     |
|-----|-------------|-----------------------------------|-------------------------------|------------------------------------|-------------------------------|----------|----------|-----|-----|
| 80  | 29 Oct 2019 | Bashayer, Asir,<br>Saudi Arabia   | <i>V. vinifera</i>            | HMS Mushtaq, & M<br>Kamran         | 19°43'4.39"N,<br>41°55'5.13"E | MZ435918 | N/A      | 489 | N/A |
| 104 | 14 Apr 2018 | Taif, Makkah,<br>Saudi Arabia     | <i>P. granatum</i>            | HMS Mushtaq                        | 21°17'3.51"N,<br>40°23'0.16"E | MZ435919 | MZ425493 | 497 | 410 |
| 105 | 13 Feb 2012 | Madinah, Madinah,<br>Saudi Arabia | <i>C. erectus</i>             | M Kamran [36]                      | 24°28'7.66"N,<br>39°37'4.19"E | N/A      | N/A      | N/A | N/A |
| 134 | 01 Oct 2020 | Tayma, Tabuk,<br>Saudi Arabia     | <i>Rosa</i> sp.<br>(Rosaceae) | HMS Mushtaq, JH<br>Mirza & EM Khan | 27°37'33.6"N,<br>38°30'48.1"E | OP821242 | OP825121 | 497 | 410 |
| 137 | 01 Oct 2020 | Tayma, Tabuk,<br>Saudi Arabia     | <i>P. granatum</i>            | HMS Mushtaq, JH<br>Mirza & EM Khan | 27°38'00.5"N,<br>38°33'51.0"E | OP821243 | OP825122 | 497 | 410 |
| 147 | 08 Oct 2020 | Aridhah, Jizan,<br>Saudi Arabia   | <i>M. indica</i>              | HMS Mushtaq, JH<br>Mirza & EM Khan | 17°02'25.9"N,<br>43°02'42.8"E | OP821244 | OP825123 | 496 | 410 |
| 178 | 26 Oct 2018 | Al Badari, Asyut,<br>Egypt        | <i>M. indica</i>              | SA Abdelgayed                      | 26°58'45.9"N,<br>31°26'18.4"E | N/A      | N/A      | N/A | N/A |
| 180 | 24 Jul 2018 | Sahel Selim, Asyut,<br>Egypt      | <i>M. indica</i>              | SA Abdelgayed                      | 27°04'03.6"N,<br>31°20'32.9"E | N/A      | N/A      | N/A | N/A |
| 181 | 15 Aug 2018 | Sahel Selim, Asyut,<br>Egypt      | <i>V. vinifera</i>            | SA Abdelgayed                      | 27°04'03.6"N,<br>31°20'32.9"E | N/A      | N/A      | N/A | N/A |
| 183 | 05 May 2018 | Badari, Asyut,<br>Egypt           | <i>M. indica</i>              | SA Abdelgayed                      | 26°58'45.9"N,<br>31°26'18.4"E | N/A      | N/A      | N/A | N/A |
| 184 | 23 Apr 2022 | DG Khan, Punjab,<br>Pakistan      | <i>M. indica</i>              | M Kamran                           | 29°50'39.2"N,<br>70°29'15.8"E | OP821245 | N/A      | 430 | N/A |
| 185 | 26 Apr 2022 | DG Khan, Punjab,<br>Pakistan      | <i>M. indica</i>              | M Kamran                           | 29°50'39.2"N,<br>70°29'15.8"E | OP821246 | N/A      | 430 | N/A |

\* It represents the Mexican *Oligonychus* sp. that was claimed as *O. punicae* in Mexico [37], which does not belong to the *punicae* species complex, as revealed in the present study.

\*\* It represents the samples of *O. mangiferus* collected from the exact locality whence the original type was previously collected and described for the first time in Pakistan [9] and analyzed in the present study.

**Table S2.** Relatively measured morphometric data obtained from different aedeagal parameters — viz. height of bent aedeagal part (H), length of shaft dorsal margin (L), shaft width (W), and the angle formed between shaft axis and axis of the bent part ( $\alpha$ ) of different spider mite samples of the *punicae* species complex collected from Egypt, Mexico, Pakistan and Saudi Arabia, in the present study.

| Sample voucher no. | No. of specimens observed (n) | H/L <sup>1</sup> | H/W <sup>2</sup> | $\alpha^3$ |
|--------------------|-------------------------------|------------------|------------------|------------|
| 1                  | 1                             | 0.50             | 1.30             | 79°        |
| 5                  | 1                             | 0.60             | 1.60             | 62°        |
| 6                  | N/A                           | N/A              | N/A              | N/A        |
| 13                 | 1                             | 0.50             | 1.10             | 70°        |
| 14                 | 2                             | 0.34–0.49        | 0.71–1.11        | 65°–78°    |
| 21                 | 1                             | 0.26             | 0.65             | 74°        |
| 26                 |                               | 0.46             | 1.20             | 68°        |
| 27                 | N/A                           | N/A              | N/A              | N/A        |
| 37                 | 1                             | 0.50             | 1.20             | 63°        |
| 42                 | 3                             | 0.50             | 0.90–1.40        | 63°–70°    |
| 43                 | 2                             | 0.50             | 1.30–1.50        | 69°–70°    |
| 44                 | 1                             | 0.38             | 0.90             | 74°        |
| 48                 | 1                             | 0.40             | 1.00             | 77°        |
| 52*                | 5                             | 0.93–1.30        | 1.80–2.50        | 57° – 87°  |
| 56                 | 1                             | 0.37             | 0.92             | 74°        |
| 59                 | 1                             | 0.43             | 0.81             | 68°        |
| 62                 | 1                             | 0.50             | 1.20             | 70°        |
| 63                 | 1                             | 0.60             | 1.60             | 69°        |
| 64                 | 1                             | 0.47             | 0.94             | 76°        |
| 70                 | N/A                           | N/A              | N/A              | N/A        |
| 71**               | 2                             | 0.40             | 1.30             | 65°–76°    |
| 72**               | N/A                           | N/A              | N/A              | N/A        |
| 73                 | 1                             | 0.50             | 1.10             | 65°        |
| 74                 | N/A                           | N/A              | N/A              | N/A        |
| 75                 | N/A                           | N/A              | N/A              | N/A        |
| 76                 | 1                             | 0.31             | 0.90             | 73°        |
| 77                 | 1                             | 0.63             | 0.81             | 69°        |
| 78                 | N/A                           | N/A              | N/A              | N/A        |
| 80                 | 2                             | 0.32–0.34        | 0.80–1.30        | 70°        |
| 104                | N/A                           | N/A              | N/A              | N/A        |
| 105                | 1                             | 0.50             | 1.40             | 64°        |
| 134                | N/A                           | N/A              | N/A              | N/A        |
| 137                | N/A                           | N/A              | N/A              | N/A        |
| 147                | N/A                           | N/A              | N/A              | N/A        |
| 178                | 1                             | 0.46             | 1.00             | 63°        |
| 180                | 1                             | 0.51             | 1.3              | 61°        |
| 181                | 1                             | 0.29             | 0.64             | 66°        |
| 183                | 3                             | 0.42–0.60        | 0.97–1.64        | 58°–73°    |

|     |     |     |     |     |
|-----|-----|-----|-----|-----|
| 184 | N/A | N/A | N/A | N/A |
| 185 | N/A | N/A | N/A | N/A |

<sup>1</sup>**H/L**, The height of bent aedeagal part (H) divided by the length of shaft dorsal margin (L).

<sup>2</sup>**H/W**, The height of bent aedeagal part (H) divided by the shaft width (W).

<sup>3</sup>**α**, The angle formed between shaft axis and axis of the bent aedeagal part.

\*It represents the Mexican *Oligonychus* sp., previously claimed as *O. punicae* in Mexico [37], which does not belong to the *punicae* species complex, as revealed in the present study.

\*\*It represents the samples of *O. mangiferus* that were collected from the exact locality whence the original type was previously collected and described for the first time in Pakistan [9] and analyzed in the present study.

**Table S3.** Genetic divergence (pairwise p-distance) based on ITS2 sequences, either obtained in the present study or retrieved from GenBank, among various spider mite samples, representing different populations of four closely related *Oligonychus* species, reported from different countries.

| No. | Spider mite samples/species                                  | 1<br>(H <sub>1</sub> ) | 2<br>(H <sub>2</sub> ) | 3<br>(H <sub>3</sub> ) | 4<br>(H <sub>4</sub> ) | 5     | 6     | 7     | 8     |
|-----|--------------------------------------------------------------|------------------------|------------------------|------------------------|------------------------|-------|-------|-------|-------|
| 1   | <i>O. punicae</i> / <i>O. mangiferus</i> (H <sub>1</sub> )*  | 0.000                  |                        |                        |                        |       |       |       |       |
| 2   | <i>O. mangiferus</i> (H <sub>2</sub> )<br>(EF433286, Israel) | 0.003                  | 0.000                  |                        |                        |       |       |       |       |
| 3   | <i>O. mangiferus</i> (H <sub>3</sub> )<br>(MN969994, India)  | 0.010                  | 0.008                  | 0.000                  |                        |       |       |       |       |
| 4   | <i>O. mangiferus</i> (H <sub>4</sub> )<br>(KC283029, India)  | 0.016                  | 0.013                  | 0.021                  | 0.000                  |       |       |       |       |
| 5   | <i>O. ununguis</i><br>(HQ709242, China)                      | 0.125                  | 0.128                  | 0.130                  | 0.138                  | 0.000 |       |       |       |
| 6   | <i>O. ununguis</i><br>(JF774179, Korea)                      | 0.120                  | 0.122                  | 0.130                  | 0.135                  | 0.115 | 0.000 |       |       |
| 7   | <i>O. coffeae</i><br>(AY750706, Taiwan)                      | 0.143                  | 0.143                  | 0.151                  | 0.156                  | 0.138 | 0.122 | 0.000 |       |
| 8   | <i>O. punicae</i> **<br>(Mexico)                             | 0.172                  | 0.174                  | 0.182                  | 0.188                  | 0.151 | 0.125 | 0.164 | 0.000 |

\*H1 represents the ITS2 haplotype 1 that contains 34 samples collected from Egypt, Israel, Pakistan, and Saudi Arabia (voucher no: 1, 5, 6, 13, 14, 21, 26, 27, 37, 42, 43, 44, 48, 56, 59, 62, 63, 64, 70, 71, 72, 73, 74, 76, 77, 78, 80, 104, 134, 137, 147, 184, 185; Table S1 & accession no: DQ656486) of the *punicae* species complex.

\*\*The two samples of the claimed *O. punicae* from Mexico [37] (voucher no: 52; Table S1 & accession no: KC352302) that needs to be re-identified.

- The yellow highlighted section represents four different haplotypes of the *punicae* species complex.

**Table S4.** Genetic divergence (pairwise p-distance) based on COI sequences, either obtained in the present study or retrieved from GenBank, among various spider mite samples, representing different populations of 18 closely related *Oligonychus* species, reported from different countries.

| No. | Spider mite samples/species                                            | 1     | 2     | 3     | 4     | 5     | 6     | 7     | 8     | 9     | 10    | 11    | 12    | 13    | 14    | 15    | 16    | 17    | 18    | 19    | 20    | 21    | 22    | 23    | 24 |
|-----|------------------------------------------------------------------------|-------|-------|-------|-------|-------|-------|-------|-------|-------|-------|-------|-------|-------|-------|-------|-------|-------|-------|-------|-------|-------|-------|-------|----|
| 1   | <i>O. punicae</i> ( <b>H<sub>1</sub></b> )*                            | 0.000 |       |       |       |       |       |       |       |       |       |       |       |       |       |       |       |       |       |       |       |       |       |       |    |
| 2   | <i>O. punicae</i> ( <b>H<sub>2</sub></b> )<br>(21; Saudi Arabia)       | 0.006 | 0.000 |       |       |       |       |       |       |       |       |       |       |       |       |       |       |       |       |       |       |       |       |       |    |
| 3   | <i>O. punicae</i> /<br><i>O. mangiferus</i> ( <b>H<sub>3</sub></b> )** | 0.003 | 0.003 | 0.000 |       |       |       |       |       |       |       |       |       |       |       |       |       |       |       |       |       |       |       |       |    |
| 4   | <i>O. mangiferus</i> ( <b>H<sub>4</sub></b> ***)                       | 0.003 | 0.010 | 0.006 | 0.000 |       |       |       |       |       |       |       |       |       |       |       |       |       |       |       |       |       |       |       |    |
| 5   | <i>O. mangiferus</i> ( <b>H<sub>5</sub></b> )<br>(MT479179; India)     | 0.010 | 0.010 | 0.006 | 0.006 | 0.000 |       |       |       |       |       |       |       |       |       |       |       |       |       |       |       |       |       |       |    |
| 6   | <i>O. vitis</i> ( <b>H<sub>6</sub></b> )<br>(MW517748; India)          | 0.006 | 0.006 | 0.003 | 0.003 | 0.003 | 0.000 |       |       |       |       |       |       |       |       |       |       |       |       |       |       |       |       |       |    |
| 7   | <i>O. punicae</i><br>(KY474209, USA)****                               | 0.086 | 0.092 | 0.089 | 0.083 | 0.089 | 0.086 | 0.000 |       |       |       |       |       |       |       |       |       |       |       |       |       |       |       |       |    |
| 8   | <i>O. punicae</i><br>(52, Mexico)*****                                 | 0.096 | 0.102 | 0.099 | 0.092 | 0.099 | 0.096 | 0.083 | 0.000 |       |       |       |       |       |       |       |       |       |       |       |       |       |       |       |    |
| 9   | <i>O. ununguis</i><br>(AB683664, Japan)                                | 0.102 | 0.108 | 0.105 | 0.099 | 0.105 | 0.102 | 0.089 | 0.080 | 0.000 |       |       |       |       |       |       |       |       |       |       |       |       |       |       |    |
| 10  | <i>O. gotohi</i><br>(AB683669, Japan)                                  | 0.067 | 0.073 | 0.070 | 0.064 | 0.070 | 0.067 | 0.076 | 0.073 | 0.080 | 0.000 |       |       |       |       |       |       |       |       |       |       |       |       |       |    |
| 11  | <i>O. coffeae</i><br>(AB683671, Japan)                                 | 0.080 | 0.086 | 0.083 | 0.076 | 0.080 | 0.080 | 0.064 | 0.102 | 0.102 | 0.089 | 0.000 |       |       |       |       |       |       |       |       |       |       |       |       |    |
| 12  | <i>O. coffeae</i><br>(KR870322, India)                                 | 0.099 | 0.105 | 0.102 | 0.096 | 0.102 | 0.099 | 0.083 | 0.080 | 0.092 | 0.083 | 0.089 | 0.000 |       |       |       |       |       |       |       |       |       |       |       |    |
| 13  | <i>O. castaneae</i><br>(AB683666, Japan)                               | 0.080 | 0.086 | 0.083 | 0.076 | 0.083 | 0.080 | 0.080 | 0.086 | 0.061 | 0.070 | 0.089 | 0.076 | 0.000 |       |       |       |       |       |       |       |       |       |       |    |
| 14  | <i>O. pustulosus</i><br>(AB683655, Japan)                              | 0.086 | 0.092 | 0.089 | 0.083 | 0.089 | 0.086 | 0.061 | 0.083 | 0.083 | 0.076 | 0.070 | 0.061 | 0.080 | 0.000 |       |       |       |       |       |       |       |       |       |    |
| 15  | <i>O. tsudomei</i><br>(AB683659, Japan)                                | 0.086 | 0.092 | 0.089 | 0.083 | 0.089 | 0.086 | 0.073 | 0.083 | 0.102 | 0.083 | 0.092 | 0.067 | 0.089 | 0.076 | 0.000 |       |       |       |       |       |       |       |       |    |
| 16  | <i>O. ilicis</i><br>(AB683660, Japan)                                  | 0.086 | 0.092 | 0.089 | 0.083 | 0.083 | 0.086 | 0.054 | 0.083 | 0.083 | 0.070 | 0.070 | 0.096 | 0.086 | 0.076 | 0.092 | 0.000 |       |       |       |       |       |       |       |    |
| 17  | <i>O. amiensis</i><br>(AB683673, Japan)                                | 0.102 | 0.108 | 0.105 | 0.099 | 0.105 | 0.102 | 0.089 | 0.105 | 0.089 | 0.089 | 0.096 | 0.096 | 0.080 | 0.083 | 0.092 | 0.076 | 0.000 |       |       |       |       |       |       |    |
| 18  | <i>O. hondoensis</i><br>(AB683658, Japan)                              | 0.111 | 0.118 | 0.115 | 0.108 | 0.115 | 0.111 | 0.086 | 0.105 | 0.099 | 0.115 | 0.096 | 0.086 | 0.086 | 0.080 | 0.099 | 0.099 | 0.105 | 0.000 |       |       |       |       |       |    |
| 19  | <i>O. perditus</i><br>(AB683665, Japan)                                | 0.111 | 0.118 | 0.115 | 0.108 | 0.115 | 0.111 | 0.096 | 0.080 | 0.073 | 0.067 | 0.105 | 0.096 | 0.086 | 0.089 | 0.092 | 0.092 | 0.108 | 0.118 | 0.000 |       |       |       |       |    |
| 20  | <i>O. clavatus</i><br>(AB683653, Japan)                                | 0.076 | 0.083 | 0.080 | 0.073 | 0.080 | 0.076 | 0.054 | 0.092 | 0.099 | 0.067 | 0.080 | 0.080 | 0.070 | 0.070 | 0.076 | 0.064 | 0.089 | 0.086 | 0.096 | 0.000 |       |       |       |    |
| 21  | <i>O. neocastaneae</i><br>(LC341206, Japan)                            | 0.076 | 0.083 | 0.080 | 0.073 | 0.080 | 0.076 | 0.083 | 0.096 | 0.102 | 0.073 | 0.086 | 0.086 | 0.064 | 0.083 | 0.086 | 0.083 | 0.108 | 0.111 | 0.108 | 0.067 | 0.000 |       |       |    |
| 22  | <i>O. karamatus</i><br>(AB683656, Japan)                               | 0.092 | 0.099 | 0.096 | 0.089 | 0.096 | 0.092 | 0.064 | 0.076 | 0.096 | 0.076 | 0.070 | 0.067 | 0.073 | 0.070 | 0.083 | 0.067 | 0.086 | 0.089 | 0.086 | 0.067 | 0.070 | 0.000 |       |    |
| 23  | <i>O. camelliae</i><br>(AB683662, Japan)                               | 0.115 | 0.115 | 0.111 | 0.111 | 0.105 | 0.108 | 0.083 | 0.083 | 0.083 | 0.086 | 0.092 | 0.092 | 0.080 | 0.083 | 0.089 | 0.076 | 0.092 | 0.096 | 0.086 | 0.086 | 0.102 | 0.089 | 0.000 |    |

\* H1 represents the COI haplotype 1 that contains seven samples of *O. punicae* collected from Saudi Arabia (voucher no: 1, 59, 62, 63, 104, 134 & 137; Table S1).

\*\* H3 represents the COI haplotype 3 that contains eight samples of the *punicae* species complex collected from Egypt, Pakistan, and Saudi Arabia (voucher no: 37, 42, 48, 71, 72, 74, 78 & 147; Table S1).

\*\*\* H4 represents the COI haplotype 4 that contains two accession numbers KX013767 and KX669024, identified as *O. mangiferus* from India.

\*\*\*\* The COI haplotype representing the claimed *O. punicae* from USA that needs to be re-identified.

\*\*\*\*\* The COI haplotype representing the claimed *O. punicae* from Mexico [37] (voucher no: 52; Table S1) that needs to be re-identified.

- The yellow highlighted section represents six different haplotypes of the *punicae* species complex.



**Table S5.** Relatively measured morphometric data obtained from different aedeagal parameters — viz. height of bent aedeagal part (H), length of shaft dorsal margin (L), shaft width (W), and the angle formed between shaft axis and axis of the bent part ( $\alpha$ ) of different populations of *Oligonychus punicae*, *O. mangiferus* and *O. vitis*, previously described from various geographical localities/countries.

| Species                 | References | H/L <sup>1</sup> | H/W <sup>2</sup> | $\alpha^3$ |
|-------------------------|------------|------------------|------------------|------------|
| a) <i>O. punicae</i>    | [18]*      | 0.66             | 1.27             | 52°        |
|                         | [14]       | 0.65             | 1.00             | 55°        |
|                         | [4]        | 0.46             | 1.13             | 85°        |
|                         | [45]       | 0.39             | 0.90             | 80°        |
|                         | [53]       | 0.41             | 1.27             | 78°        |
|                         | [5]        | 0.85             | 1.44             | 80°        |
|                         | [43]       | 0.42             | 1.23             | 92°        |
|                         | [3]        | 0.53             | 1.20             | 98°        |
|                         | [40]       | 0.44             | 1.10             | 92°        |
|                         | [17]       | 0.36             | 0.71             | 81°        |
|                         | [10]       | 0.38             | 0.96             | 86°        |
| b) <i>O. mangiferus</i> | [9]**      | 0.14             | 0.32             | 85°        |
|                         | [14]       | 0.39–0.53        | 1.00–1.80        | 73°        |
|                         | [4]        | 0.29–0.36        | 0.80             | 73°–89°    |
|                         | [51]       | 0.43             | 0.81             | 83°        |
|                         | [7]        | 0.29–0.31        | 0.75–0.64        | 60°        |
|                         | [5]        | 0.39             | 0.86             | 72°        |
|                         | [3]        | 0.38             | 1.10             | 73°        |
|                         | [25]       | 0.34             | 0.80             | 87°        |
|                         | [42]       | 0.30             | 0.83             | 63°        |
|                         | [41]       | 0.26             | 0.75             | 80°        |
|                         | [17]       | 0.33             | 0.71             | 80°        |
| c) <i>O. vitis</i>      | [19]***    | 0.41             | 1.10             | 120°       |
|                         | [7]        | 0.43             | 0.86             | 69°        |
|                         | [3]        | 0.39             | 0.77             | 74°        |
|                         | [13]       | 0.38             | 0.80             | 70°        |
|                         | [17]       | 0.44             | 0.94             | 66°        |

<sup>1</sup>H/L, The height of bent aedeagal part (H) divided by length of shaft dorsal margin (L).

<sup>2</sup>H/W, The height of bent aedeagal part (H) divided by shaft width (W).

<sup>3</sup> $\alpha$ , The angle formed between shaft axis and axis of the bent aedeagal part.

\* It represents the population of *O. punicae*, reported in the original description from India.

\*\* It represents the population of *O. mangiferus*, reported in the original description from Pakistan.

\*\*\* It represents the population of *O. vitis*, reported in the original description from Egypt.
